# Supplementary material for: Adding value to Extended-range Forecasts in Northern Europe by Statistical Post-processing Using Stratospheric Observations
Source: Copernicus journal article supplement (doi:10.5194/acp-2019-679), 2019-08-19
Supplement: Supplementary file [file acp-2019-679-AC1-supplement.pdf]

**Authors Response to Interactive comments on “Adding value to Extended-range Forecasts in Northern Europe by Statistical Post-processing Using Stratospheric Observations” by Natalia Korhonen et al.**

The comments are in Black and the responses in blue.

We thank the reviewers for their thoughtful and constructive comments.

We have done several major changes to the manuscript. First, we have examined the mean AO instead of the minimum AO. In this process the Figure 2 was replotted. Second, we have increased the sample size of forecasts and observations by including all cases in Nov-Feb 1981-2016 (not just the cases after the first Monday in each month). In this process the Figures 2, 4, 5, and 6 were replotted. Third, we have in this author response demonstrated the ZMW at 60 °N and 10 hPa at the start of the forecast and 1-6 weeks after different stratospheric situations. In addition to these, we have done several editings to the manuscript, to clarify it, according to the comments. Below we respond to the reviewers point-by-point.

Best regards

Natalia Korhonen and co-authors

**Anonymous Referee #1 Received and published: 16 September 2019**

The authors present a genuinely interesting analysis that contains new methods to improve extended-range forecasts. The great improvement in forecast skill must be useful work. I found the manuscript interesting and believe others would as well, but I have several questions and comments in the current form.

**Major comments**

1. The authors used ‘minimum daily AO index’ but it seems that there is no clear justification for the use of ‘minimum’. Use of the minimum AO index might have more uncertainty because the value fluctuates with a day. The uncertainty would be reduced if the authors use weekly mean value rather than the ‘minimum’. It would be helpful to isolate the significant skill increase from sampling issues. Additionally, the post-processing revises weekly mean temperature. This is an additional reason to justify why we need ‘minimum’ AO index rather than weekly mean.

As suggested, we have now used the “mean” instead of “minimum” in the current manuscript.

2. I am not sure the how the QBO can modulate AO index at weekly time scale. The QBO has an average period of ~28 month. The QBO phase tends to prevail for the entire season so how can we connect dynamics between weekly variation of the AO and QBO?

QBO gives only monthly impact on the probability forecast, however, the ZMW at 60 °N at 10 hPa (indicating the strength of the polar vortex) gives weekly impact as it is using the last 10 days preceding the start of the forecast.

3. The authors suggested that great improvement in forecast skill associated with QBO polar vortex connection. The past studies suggested that the EQBO could modulate polar vortex, which in turn lead the AO. However, EQBO and polar vortex is not much coincided (Fig. 2). The number of EQBO (u wind <10m/s) is 34 and week vortex (ZMW <3.8m/s) is 9. Sum of them is 43 but the number of SWIneg cases are 41, which means the events satisfying both condition is only 2. This implies that there should be relationship between EQBO and AO, which is independent to polar vortex. The authors should elaborate introduction and discussion for the prediction skill source for the statistical post-processing.

In the current revised manuscript we increased the sample size by including all cases in Nov-Feb 1981-2016 (not just the cases after the first Monday in each month). Thereby the number of cases, n, in Figure 2 is now higher than in the discussion paper. We plotted Figure AR1 (in this document) to demonstrate how the mean ZMW at 60 °N 10 hPa was at the start of *EQBO*, *WQBO* etc. (Fig. AR1 a) and 1-6 weeks after *EQBO*, *WQBO* etc. (Fig. AR1 b-d). Fig. AR1 a) shows that the weaker than 3.8m/s ZMW does indeed not often coincide with the *EQBO* etc. at the start of the forecast. However, Fig. AR1 b-d shows that the mean ZMW at 60 °N 10 hPa is lower 3-6 weeks after *EQBO* than after *WQBO*.

Editings to Introduction:

“Scaife et al. (2014, Fig.4a) demonstrated indicators of a more negative AO in the easterly QBO at level 30 hPa than in the westerly QBO phase at this level.”

Editings to Discussion:

“We investigated the prediction source of the QBO at 30 hPa. In line with Scaife et al. (2014) we found that AO was weaker 1-6 weeks after EQBO than WQBO at 30 hPa. As negative AO index enables cold air outbreaks to Northern Europe (Thompson et al. 2002, Tomassini et al. 2012) and positive AO index tends to bring milder and wetter than average weather to Northern Europe (Limpasuvan et al. 2005), we tested the predictor  $SWI_{neg}/SWI_{plain}$  as a predictor of mean surface temperature in Northern Europe for forecast weeks 3-6. We found that the mean surface temperature anomalies in Northern Europe in November–February in 1981–2016 after SWIneg and SWIplain were statistically significantly different, with anomalously cold surface temperatures more common 3–6 weeks after SWIneg.”

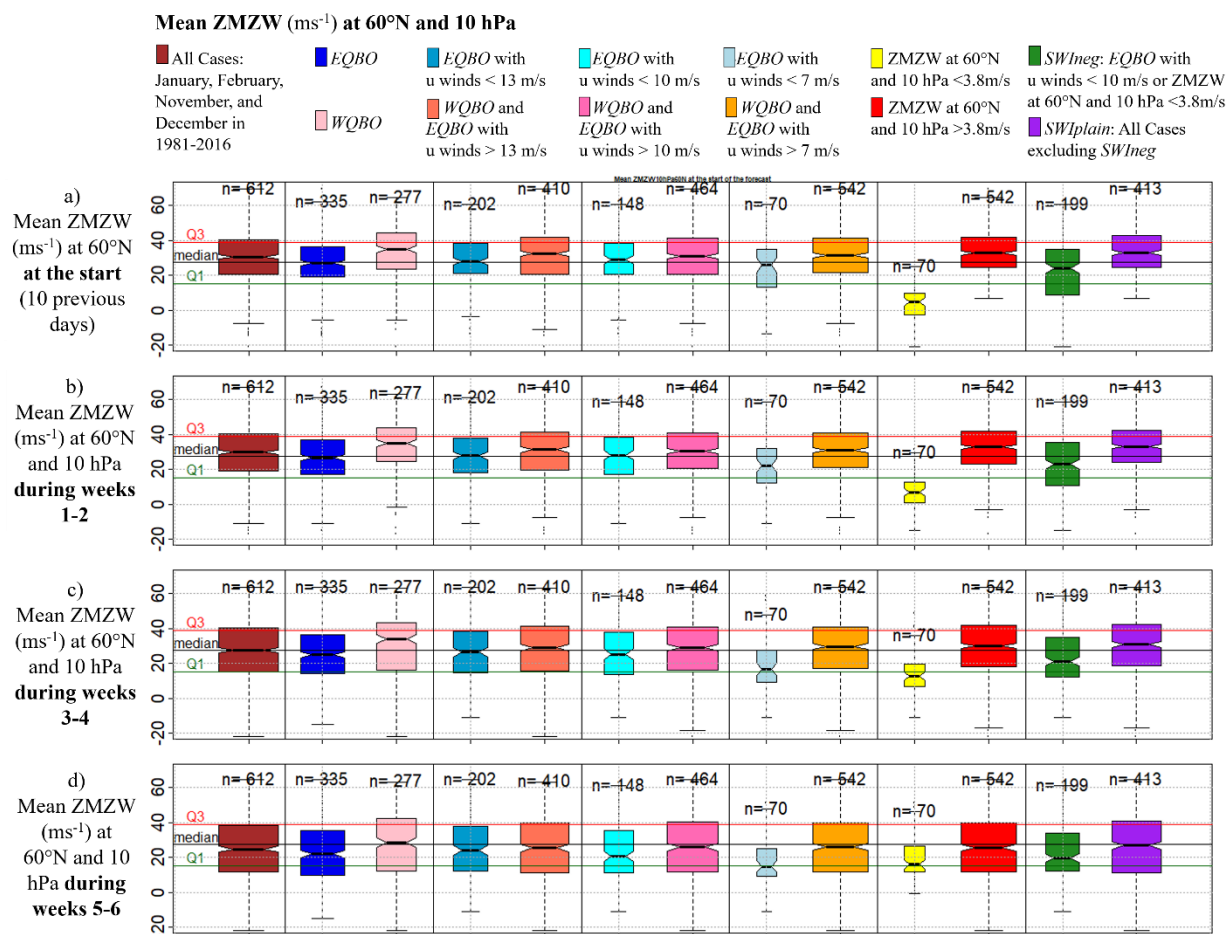

*Figure AR1. Mean Zonal Mean Zonal Wind (ZMW) at 60°N and 10 hPa. The red, black and green vertical lines represent the third quantile, the median, and the first quantile, respectively, of the ZMW at 60°N and 10 hPa in November-March 1981-2016. The horizontal line dividing each box into two parts shows the median of each data, the ends of the box show the lower and upper quartiles, and the whiskers represent the highest and the lowest values excluding outliers. The  $n$  written above each box indicates the number of observations in each group. The widths of the boxes have been drawn proportional to the square-roots of  $n$ . The notches of each side of the boxes were calculated by R boxplot.stats. If the notches of two plots do not overlap, this is 'strong evidence' that the two medians differ (Chambers et al., 1983, p. 62). ZMW=zonal mean zonal wind. SWI=Stratospheric Wind Index.*

#### Minor comments

The annotation “Fig. 2 EQBO and vortex ZMW < 3.8m/s” (green) does not correspond to decision tree in Figure. 3. Please revise it for the better understanding.

We removed the colors from Figure 3 to avoid misunderstanding.

## Anonymous Referee #2 Received and published: 16 September 2019

### Summary

The authors use a post-processing technique based on stratospheric predictors of the Arctic Oscillation on ECMWF forecasts to try to improve predictive skill of surface temperature at weeks 3-6. Overall the paper addresses relevant scientific questions (given the lack of some stratospheric processes such as the QBO and its teleconnections in the forecast model), but certain aspects of the paper could be clarified and reorganized. I also have questions about their particular technique of only using forecasts made on the first week of each month, and using stratospheric data at 10 hPa, rather than in the lower stratosphere which is a better indicator of stratosphere-troposphere coupling. I suggest a major revision.

### General Comments

1) More could be explained up front about how the QBO teleconnection processes in particular are not well captured in the forecast models (particularly after early winter, as per Garfinkel et al. 2018), and why. In particular, see Line 14-15, page 3: Here it should be specifically mentioned whether the ECMWF S2S model (the version used here) is able to self-generate QBO variability (most S2S models cannot- instead they are initialized with observed QBO winds and degrade relatively quickly away from that towards model climatology). This should be further emphasized (possibly showing something like the forecasted QBO winds in the tropics compared to observed values for each of the initialization dates used here, so it's clear that the model is missing this process).

The version of the ECMWF used here is IFS cycle 43r1. The representation of the QBO in this version of the IFS is described in detail in Johnson et al. (2019) and Stockdale et al (2018). The skill of the QBO forecasts decreases substantially after the first 2 months of the forecast. This is shown to be sensitive to the parametrization of the tropical non-orographic gravity wave drag in the model (see also Polichtchouk et al. (2018), Polichtchouk et al. (2017)). The amplitude of the QBO tends to weaken through the forecast. All the forecasts in our study are initialised from ERA-Interim reanalysis: the QBO is well represented in the initial conditions but as noted the amplitude tend to weakens during the 6 weeks of the forecast. This is shown in Garfinkel et al (2018) and we have revised the text to clarify this.

Johnson, S. J., Stockdale, T. N., Ferranti, L., Balmaseda, M. A., Molteni, F., Magnusson, L., Tietsche, S., Decremet, D., Weisheimer, A., Balsamo, G., Keeley, S. P. E., Mogensen, K., Zuo, H., and Monge-Sanz, B. M.: SEAS5: the new ECMWF seasonal forecast system, *Geosci. Model Dev.*, 12, 1087–1117, <https://doi.org/10.5194/gmd-12-1087-2019>, 2019.

Polichtchouk, I., et al., 2017: What influences the middle atmosphere circulation in the IFS? ECMWF Technical Memorandum No. 809.

Stockdale, T. et al., 2018. SEAS5 and the future evolution of the long-range forecast system, ECMWF Technical Memoranda n. 835. DOI: 10.21957/z3e92di7y

2) Sensitivity testing to the parameters chosen here could be further provided, as I'm not sure I understand what was the motivation for some of these choices. For example, see Line 21-25, page 5: Why were QBO winds at 30 hPa selected and was the sensitivity to this level tested? What about 40 or 50 hPa? Also, I understand using the 60N 10 hPa metric for stratospheric variability, but it's not a great metric for coupling to the surface. I assume you might see much better results using winds at a lower level in the stratosphere, near 50-100 hPa. See for example Karpechko et al. 2017 (<https://doi.org/10.1002/qj.3017>). What happens if you use a lower level instead?

QBO winds at 30 hPa were chosen because we found better effect on the mean AO in the coming weeks than by the 40 hPa or 50hPa. Also Scaife et al. (2014) demonstrated in their Fig. 4a that the AO was more negative after easterly QBO at 30 hPa than westerly QBO at the same level. As we are using the mean QBO winds of the previous month as predictors, this means that in the 5-6 weeks forecast the QBO observation is 2 to 2.5 months old. Indeed the 30 hPa values in time precede the 40 hPa and 50 hPa.

Karpechko et al. 2017 found that the conditional probability of having a tropospheric signal after SSW depends on the value of AO at 150 hPa during 0-4 days after the ZMW at 60 N and 10 hPa had turned easterly (central date=CD). We are not able to directly implement this to our post-processing, as we are not using the CD, but for our post-processing of the probabilistic forecasts we are using the ZMW at 60 N and 10 hPa being below its November-March 10th percentile (3.8m/s) as an indicator for a weak polar vortex at the start of the forecast and probable a more negative surface AO index in the coming 1-6 weeks.

3) Furthermore, presumably this technique of identifying weak vortex periods (Line 25, page 5) misses quite a few observed SSW events in the stratosphere (because they don't all occur in the last 10 days of the month). Could you say something about this, and why your method is still valuable? It also seemed like the sample size for  $u < 3.8$  m/s was extremely small ( $n=9$ ) for the longer record period and must be even smaller for the shorter 1997-2016 period of the hindcasts. I wondered why it was so small I wondered why it was so small (144 forecasts, \*10th percentile climatology = 14 times this should happen). Can much be said for a predictor that only happens 9 times in 36 years? What happens if this threshold is relaxed to include more events? This is another reason why getting daily tropical winds so all forecast initialization dates may be used could be valuable. Along these lines, I'm confused about the number of events shown in Figure 2 for the two rightmost columns.

In the revised manuscript we have increased the sample size by including all cases in Nov-Feb 1981-2016 (not just the cases after the first Monday in each month). Now the sample size for  $u < 3.8$  m/s is 70 for the 1981-2016 period.

4) Finally, I'm curious about the choice of predictors in terms of their covariability. How many times when you had EQBO (and EQBO with maximum thresholds) did you also see a weak polar vortex at 60N 10mb? I assume these are correlated/concurrent, and the EQBO merely adds additional samples where the vortex is weak but not weak enough to meet the 3.8 m/s threshold. It would be interesting to state what the mean value of 60N 10mb zonal winds are during the various EQBO thresholds.

Figure AR1 above in this document shows boxplots of the mean ZMW at 60 °N 10 hPa at the start of *EQBO*, *WQBO* etc. (Fig. AR1 a) and 1-6 weeks after *EQBO*, *WQBO* etc. (Fig. AR1 b-d). Figure AR1 shows that the mean ZMW at 60 °N 10 hPa is weaker 3-6 weeks after *EQBO* and *EBOQ* with different thresholds (Fig. AR1 c-d) than at the start of the forecast (Fig. AR1 a).

### Specific Comments

1) Line 6, page 4: You don't consider forecasts in the summer here though, so why 52 weeks? Shouldn't it just be Nov-Feb forecasts? (also, because it wasn't clear I assume you mean throughout that you use any runs initialized in Nov-Feb, but the forecasts in Feb obviously forecast into March/April, correct?)

In this part and in Figure 1 we have actually verified reforecasts run for every week (52 weeks) of years 1997-2016 (20 years), i.e.,  $52 \times 20 = \text{reforecasts } 1040$ . The *SWI* post-processing, however, was done only for reforecasts initialized in Nov-Feb. And correct, the forecast initialized in February forecast into March/April and those are also included in the post-processing.

2) Line 19-20, page 4: Are the operational forecasts used in this study? I'm not sure I understand why the CRPS is adjusted for 51 members if only the hindcasts with 11 members are shown throughout, but maybe I missed where the operational forecasts were used.

There are no operational forecasts used in this study. We refer to the operational forecasts of the ECMWF's IFS which reforecasts we verify. We added "of the ECMWF's IFS" after "the operational forecasts".

3) Line 23, page 4; line 2, page 5: Not sure what is meant here by "annual mean"- do you mean the average of weeks 1-6 across all years? Or the average across all months to get one value for each year? I'm not sure I follow what is meant in this paragraph. Also, you might present Figure 1 in section 2.1 and 2.2 in relation to what is being discussed to make it clearer.

We edited this part by:

We calculated the annual means of the expected  $CRPS_{RF}$  across all weeks (1 to 52) of the years 1997-2016 reforecasts. These annual means were computed separately for lead times of 1 week, 2 weeks, 3 weeks, 4 weeks, 5 weeks, and 6 weeks, here called forecast week 1, forecast week 2, forecast week 3, forecast week 4, forecast week 5, and forecast week 6, respectively. Further, the skill scores of the annual mean CRPSs, the annual mean CRPSSs, for each lead time were calculated as follows:

$$CRPSS = 1 - \frac{CRPS_{RF}}{CRPS_{clim}} \quad (3).$$

4) Line 12-13, page 5: Isn't this data MERRA-2 reanalysis? Could you be more specific about what this data is, and how it was derived? Also, if you are using ERA-interim to verify the forecasts- why not also use ERA-interim for daily zonal winds, both in the stratosphere polar vortex and in



the tropics for the QBO? Singapore winds may not always represent the zonal-mean tropical winds that drive QBO teleconnections. Presumably the forecast model is initialized using the winds in the reanalysis, correct? And if you need daily winds to be able to look at forecasts other than the first forecast initialized each month, you could easily get this data all from one product, rather than three different products.

Yes, this is MERRA-2 reanalysis, we added this information to the manuscript.

In the current manuscript we increased the sample size by including all cases in Nov-Feb 1981-2016 (not just the cases after the first Monday in each month). For QBO we still used the Singapore winds, we just used the previous months' Singapore winds for every weeks' forecast. For the ZMW at 60N and 10hPa we always used the most recent, the last 10 days' wind reanalysis data. Hence this lead to variation in *SWI* even within the month with constant QBO.

5) Line 18-30, page 5: I found this a bit hard to follow without any visual explanation, and I wonder if it would be clearer to discuss Figures 2 and 3 in this section instead of later.

To clarify what was done, we edited this part by:

As Scaife et al. (2014) demonstrated a more negative AO in the easterly QBO at 30 hPa compared to the westerly QBO at 30 hPa, we explored the AO index 1–6 weeks after following predictors:

- westerly QBO at 30 hPa, the *WQBO*,
- easterly QBO at 30 hPa, the *EQBO*,
- *EQBO* with the maximum of the monthly mean zonal wind components of the QBO between 70 hPa and 10hPa restricted to  $7\text{ms}^{-1}$ ,  $10\text{ms}^{-1}$ , and  $13\text{ms}^{-1}$ ,
- the daily ZMW at  $60^\circ\text{N}$  and 10 hPa during the last 10 days of the previous month falling below its overall wintertime (November–March 1981–2016) 10<sup>th</sup> percentile, corresponding a value of 3.8m/s, indicating a weak polar vortex already at the start of the forecast.

The statistical significance of the difference between the AO index following two different stratospheric situations, e.g., the *EQBO* and the *WQBO*, was determined using a two-sided Student's t-test with the null hypothesis that there is no difference. The most statistically significant predictors for weaker AO indexes observed 1–2 weeks, 3–4 weeks, and 5–6 weeks after these stratospheric situations, were used to define a *SWI* to be *SWI<sub>neg</sub>*; otherwise, it was defined as *SWI<sub>plain</sub>* for the beginning of each winter month (November–February) in 1981–2016.

6) Line 13, page 7: is CRPSS above zero a reasonable metric of skill? CRPSS near zero but positive surely can't be that useful (some of these values in Figure 1 are less than 0.1).

CRPSS above zero means that this probability forecast is at least better than the climatological forecast (here the climatological forecast is a 30 member ensemble of 1981-2011 weekly mean surface temperature observations).

7) Line 19, page 7: Why was only the minimum daily AO considered and not the mean? Does the mean not change enough?

As suggested, we have now used the “mean” instead of “minimum” in the current manuscript.

8) Line 25, page 8: I think Fig 4p looks very much like Fig 4j.

Yes, and we edited the text to bring this up.

9) Figure 6: How are panels (a,b) different than Figure 1? (other than being two week averages rather than 1 week).

In Figure 1 the CRPSSs are means of the reforecasts of all weeks of years 1997-2016 (52 weeks, 20 years), whereas in Figure (a,b) only reforecast initialized for November-February 1997-2016 are included.

#### Technical Edits

1) Line 19, page 1; line 22-23, page 3; possibly other locations: specify that you are referring to the previous months’ tropical stratospheric wind observations.

We edited the “observations” to be “conditions” as this includes (in addition to tropical stratospheric wind observations) also the MERRA-2 reanalysis of the zonal mean zonal wind (ZMW) at 60 °N and 10 hPa.

2) Line 2, page 2: not sure what is meant by “experimented during a one year living lab”

“during a one year living lab” was edited to “by a one year piloting phase”

3) Line 3, page 2: put comma after “production”

Done.

4) Line 24, page 2: maybe instead “other definitions have been used”

Done.

5) Line 10, page 3: I would clarify that this paper looked at S2S hindcasts similar to what you are looking at here

We edited to be:

“Even though some S2S models, including the ECMWF’s Integrated Forecasting System (IFS, Vitart, 2014), are already able to reproduce the QBO’s effect on the polar vortex, they are still underestimating the effect on surface weather (Garfinkel et al. 2018).”



6) Line 2, page 4: remove the word “scale”

Done.

7) Figure 1- dots seem a little blurry, might make sure it’s high enough resolution for final version.

Done.

8) Line 29, page 7: add in “maximum” to “QBO’s monthly mean zonal wind components” or it doesn’t make much sense

Done.

9) Line 5, page 8: add in “where” between “cases” and “the”

Done.

10) Figure 2- might be nice to put in bold those p-values that are less than 0.05. Also, shouldn’t the last column be labeled “EQBO with u winds < 10 m/s OR ZMW at 60N and 10 hPa >3.8 m/s”?

We labeled the last column as suggested.

11) Line 24, page 9: The way this is written is confusing, do you mean p decreased so significance increased?

Yes, here the “decrease” should have been “increase”. This sentence was, however, removed while editing the text.

12) Line 29, page 9: add a “to” after “corresponding”

Done.

### **Anonymous Referee #3 Received and published: 19 September 2019**

This paper describes a post-processing method to improve sub-seasonal forecasts of northern European winter temperatures, based on the state of the stratospheric polar vortex and QBO in the period immediately preceding the forecast. The paper is interesting, topical and clearly explained, but I have some reservations about the method that need to be addressed before the paper is suitable for publication.

Major comments

1. I'm not convinced about the inclusion of the QBO as a predictor of the Arctic Oscillation (AO) in the method. The authors note that the westerly / easterly QBO is associated with a stronger / weaker polar vortex, but the polar vortex is already included as the other predictor. Unless the QBO directly influences the AO independently of the polar vortex, it's hard to see how the QBO can provide additional skill in forecasting the AO. The authors state that the results are more significant when both the polar vortex and the QBO are used as predictors of the AO, presumably referring to the results in figure 2. The method partitions the 144 observed winter months (for NDJF, 1981-2016) into two sets based on a stratospheric precursor criterion (eg the polar vortex winds are either anomalously weak, or not). The aim is to make the two sets as distinct as possible in terms of their AO index values. Figure 2 shows the distribution of the AO values for each pair of sets obtained using various different criteria. The partition based on the polar vortex and the QBO (green and purple boxes) does show marginally lower p-values than the partition based on the polar vortex alone (yellow and red boxes) consistent with the authors' claim. However, the partition based on the polar vortex alone is split 9 months to 135 months, leading to quite a large uncertainty in the mean AO-index value for the set of 9 months. I suspect this is leading to a higher p-value. Were other thresholds for the polar vortex winds tried, other than 3.8m/s? In the figure, the difference between the median values appears larger for the partition based on the polar vortex alone (yellow and red boxes) than for the partition based on the polar vortex and QBO (green and purple boxes). This suggests to me that the QBO isn't obviously adding any skill in discriminating between high AO and low AO winters.

In the current manuscript we have increased the sample size by including all cases in Nov-Feb 1981-2016 (not just the cases after the first Monday in each month). Now the sample size for the partition based on the polar vortex alone is 70 (out of 612) for the 1981-2016 period giving more certainty in the mean AO index values. The difference between the median values are larger for the partition based on the polar vortex alone (yellow and red boxes) than for the partition based on the polar vortex and QBO (green and purple boxes), however the sample size for  $SWI_{neg}$  (199) is larger than weak polar vortex alone (70) giving more certainty for using this in post-processing the probabilistic 3-4 and 5-6 weeks mean temperature forecasts.

2. The method is based on partitioning the winter months into i) those with an anomalously weak polar vortex and/or easterly QBO, and ii) all the remaining winter months. It's not really obvious how this method was arrived at. Have the authors considered also separating out the set of winter months with an anomalously strong polar vortex? It seems like an obvious thing to try, and may provide additional skill in predicting the AO.

Yes, we tried this also, but so far we were not able to find predictors for the stronger AO that would have also improved the forecasting skills.

#### Minor comments

p2, line 26: How exactly is the Arctic Oscillation index defined? The authors just say it's based on 1000hPa geopotential height for 20-90N.

To clarify the AO, we added:

“In Northern Europe one of the important indicators of the large-scale weather patterns is the phase of the AO. The AO is a climate pattern characterized by winds circulating counter clockwise around the Arctic at around 55°N latitude.”

p4 line 19: "the CRPS\_RF of the CRPS\_rf" - what does this mean?

the CRPS\_RF is the expected CRPS (assuming there were 51 members) of the ECMWF's reforecast, and the CRPS\_rf is the CRPS of the ECMWF's reforecast with 11 members. We edited the text to clarify this.

p6 lines 15-22: I didn't entirely follow the method for making anomalies here - if you're just taking the mean of the 7 anomalies based on different years, aren't you going to get the same answer as just using all the years?

Yes, we changed this and the text to use just the mean of all years.

p7 line 19: The method defines the AO value as the lowest value of the daily AO index in different weeks of the forecast. Why was this chosen - is it representative of the northern European temperature in those weeks? The weekly mean AO value would presumably be less noisy.

As suggested, we have now used the “mean AO” instead of “minimum AO” in the current manuscript.

p8 line 6: the zonal mean zonal wind threshold is stated as 4.8m/s here, but 3.8m/s in figure 2.

The threshold was here corrected to 3.8m/s.
